# Supplementary material for: Patient discourses on real-time access to test results via hospital portals: a discourse analysis of semistructured interviews with Dutch patients
Source: HighWire-hosted journal article supplement (doi:10.1136/bmjopen-2024-088201), 2024-11-01
Supplement: bmjopen-2024-088201supp001_data_supplement.pdf [file bmjopen-2024-088201supp001_data_supplement.pdf]

Supplemental file 1. Table 1. Participant characteristics.

| Age<br><br>(years) | Participants (N=28)                                               |                                                                     |                                                                  |                                                                     |
|--------------------|-------------------------------------------------------------------|---------------------------------------------------------------------|------------------------------------------------------------------|---------------------------------------------------------------------|
|                    | Female (n=18, 64%)                                                |                                                                     | Male (n=10, 36%)                                                 |                                                                     |
|                    | Experience<br><br>with real-time<br><br>access (n=10,<br><br>56%) | No experience<br><br>with real-time<br><br>access (n=8,<br><br>44%) | Experience<br><br>with real-time<br><br>access (n=5,<br><br>50%) | No experience<br><br>with real-time<br><br>access (n=5,<br><br>50%) |
| 16–30              | 2 (20%)                                                           | 4 (50%)                                                             | 2 (40%)                                                          | 1 (20%)                                                             |
| 31–45              | 2 (20%)                                                           | 0 (0%)                                                              | 1 (20%)                                                          | 0 (0%)                                                              |
| 46–60              | 3 (30%)                                                           | 3 (37.5%)                                                           | 0 (0%)                                                           | 1 (20%)                                                             |
| 61–75              | 3 (30%)                                                           | 1 (12.5%)                                                           | 2 (40%)                                                          | 2 (40%)                                                             |
| 76–90              | 0 (0%)                                                            | 0 (0%)                                                              | 0 (0%)                                                           | 1 (20%)                                                             |
